# Supplementary material
Source: ML conference proceedings conference paper supplement (https://openreview.net/forum?id=XKB5Hu0ACY)

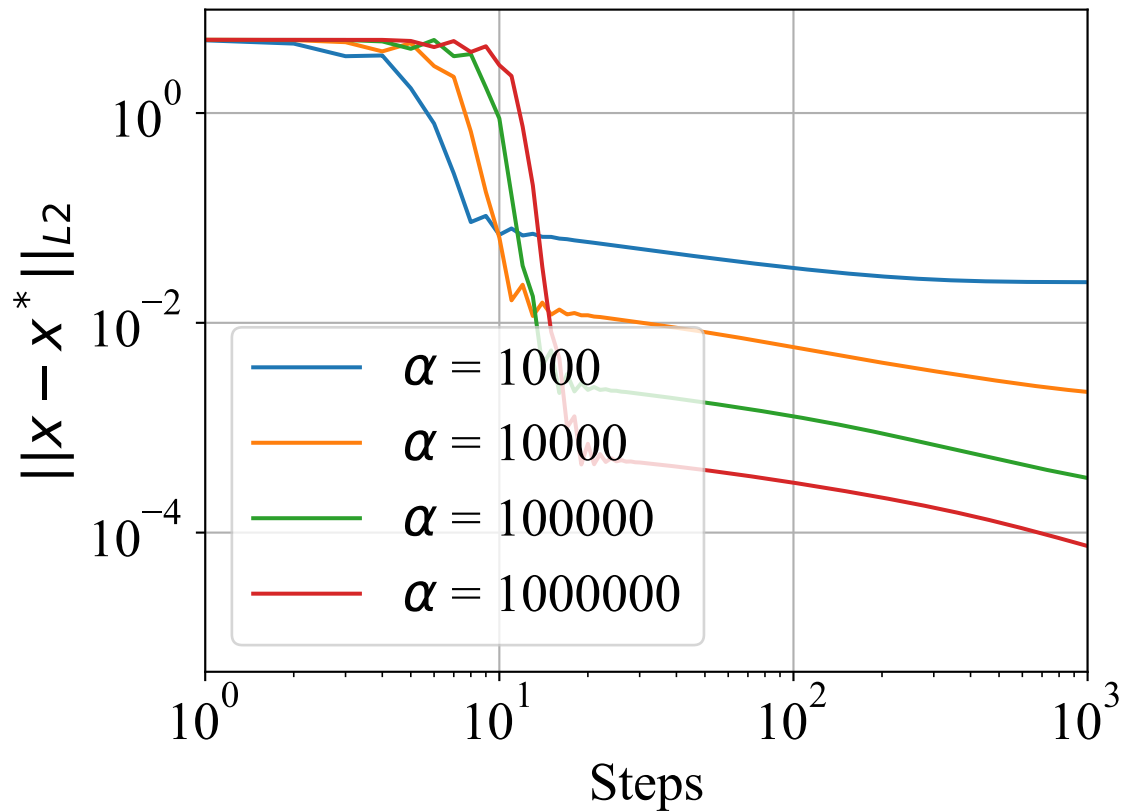

Supplement: supplementary_material [file CloserCloser.pdf › CodeHAM/LinearRegression/CloserCloser.pdf]

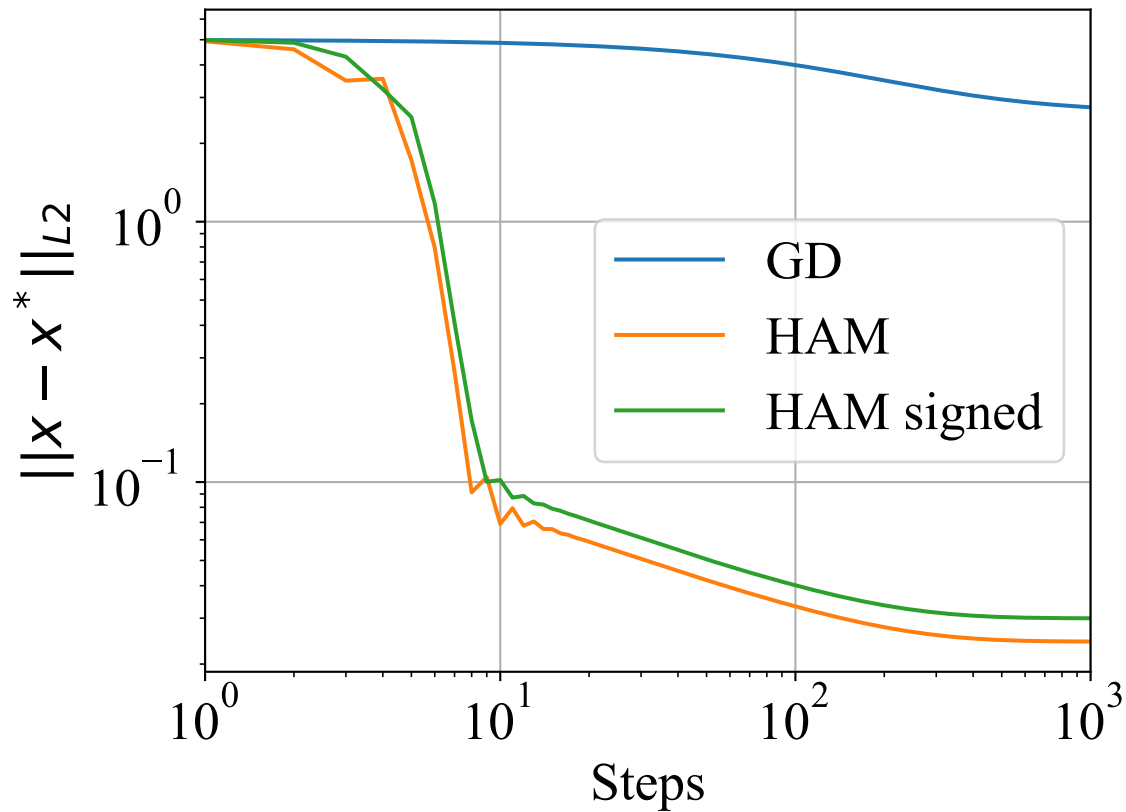

Supplement: supplementary_material [file ConvergenceGF.pdf › CodeHAM/LinearRegression/ConvergenceGF.pdf]

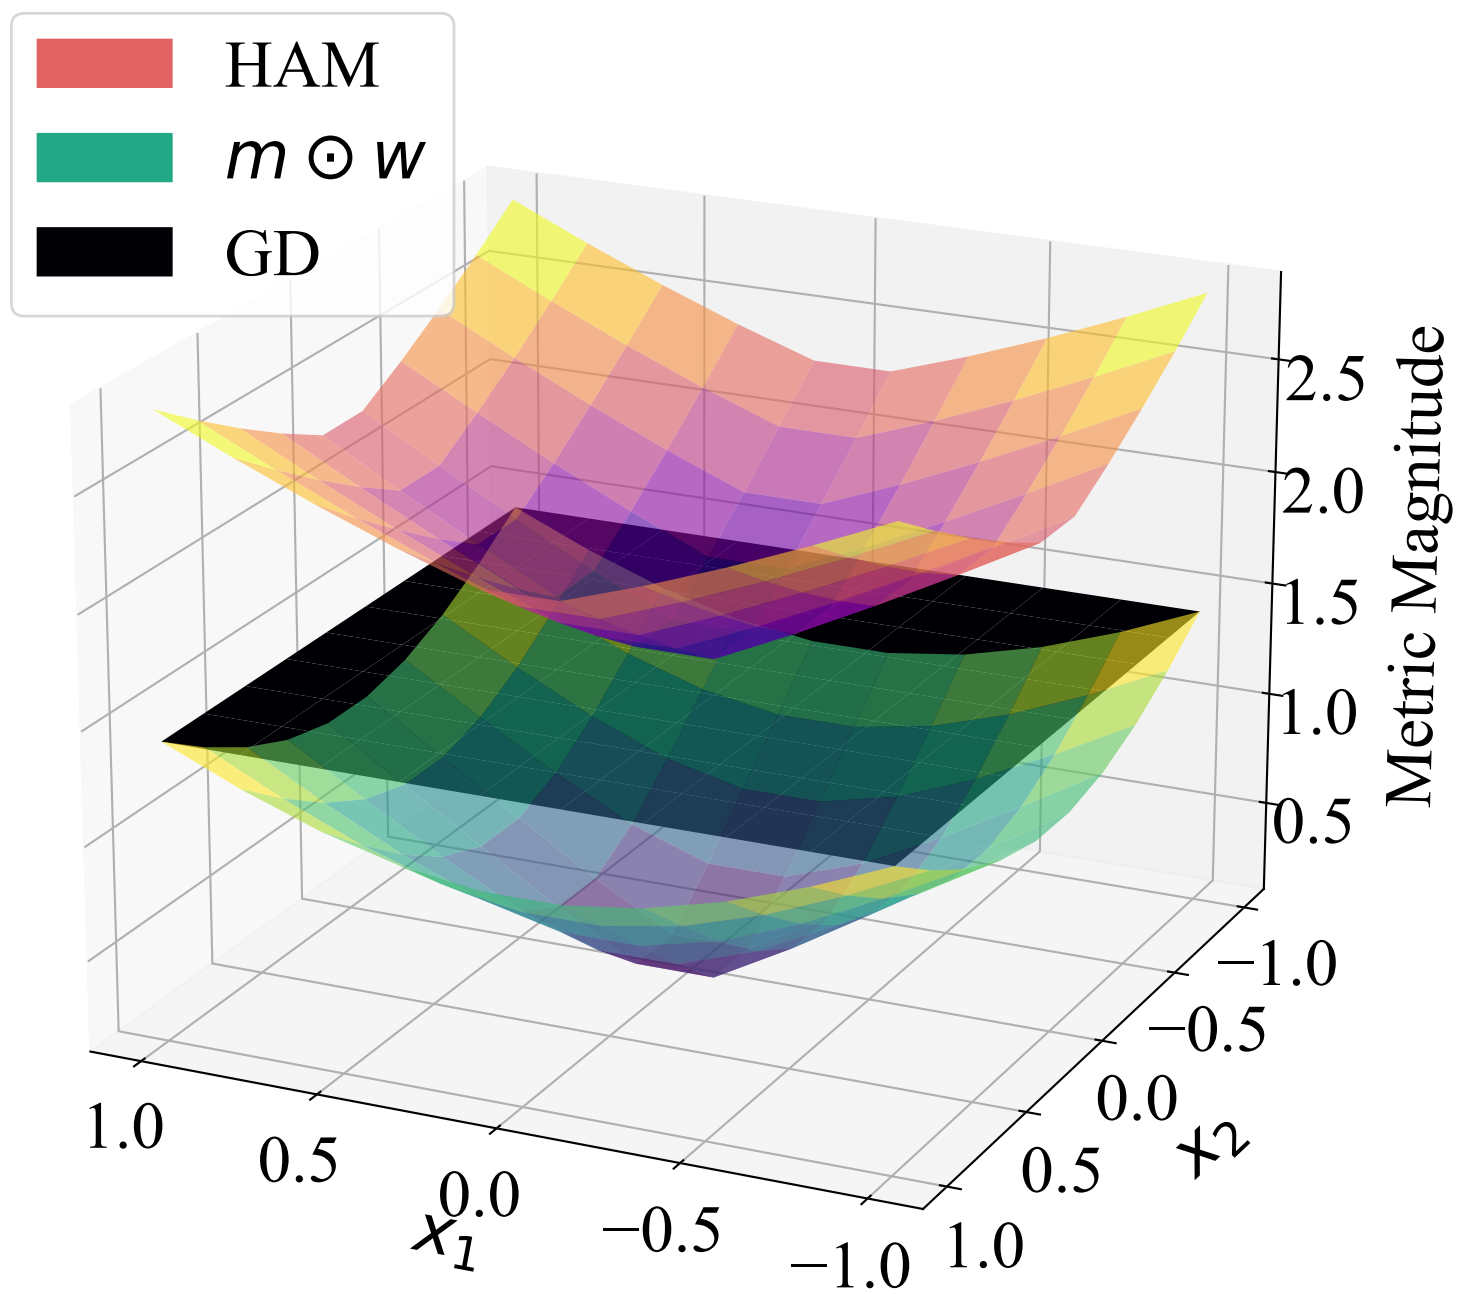

Supplement: supplementary_material [file magnitudefieldplot.pdf › CodeHAM/LinearRegression/magnitudefieldplot.pdf]

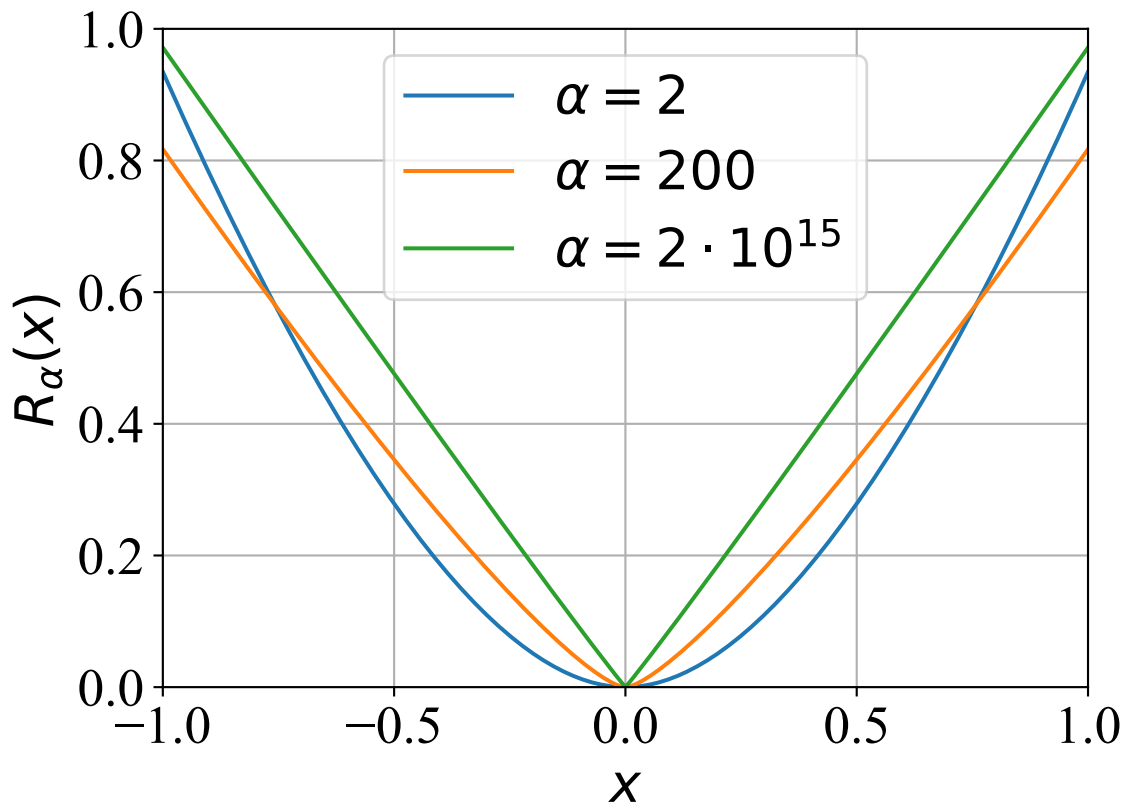

Supplement: supplementary_material [file rescaledHAMlegendre.pdf › CodeHAM/LinearRegression/rescaledHAMlegendre.pdf]
